# Supplementary material for: Application of Lipidomics for Assessing Tissue Lipid Profiles of Patients With Squamous Cell Carcinoma
Source: PubMed Central journal article supplement — Technol Cancer Res Treat. 2021 Nov 11;20:15330338211049903. doi: 10.1177/15330338211049903 (PMC8591777; doi:10.1177/15330338211049903), 2021-11-11
Supplement: sj-pdf-2-tct-10.1177_15330338211049903.pdf [file sj-pdf-2-tct-10.1177_15330338211049903.pdf]

# The Second Affiliated Hospital of Nanchang University Medical

## Research Ethics Committee Review Documents

The Examination and Approval No. Review [1204] No. (11).

|                                                                                                |                                                                                                                                                                                                                                             |                                  |                               |
|------------------------------------------------------------------------------------------------|---------------------------------------------------------------------------------------------------------------------------------------------------------------------------------------------------------------------------------------------|----------------------------------|-------------------------------|
| <b>Project name</b>                                                                            | <b>Application and Basic Research of Mass Spectrometry Analysis of Phospholipids in Judging the Boundary of Lung Cancer</b>                                                                                                                 |                                  |                               |
| <b>Review time</b>                                                                             | December 15th, 2010                                                                                                                                                                                                                         |                                  |                               |
| <b>Category of research</b>                                                                    | Scientific Research Task                                                                                                                                                                                                                    |                                  |                               |
| <b>The source of the task</b>                                                                  | <input checked="" type="checkbox"/> National Projects <input type="checkbox"/> Provincial and municipal Projects<br><input type="checkbox"/> optional Research <input type="checkbox"/> Others                                              |                                  |                               |
| <b>The number of cases</b>                                                                     | 300 cases                                                                                                                                                                                                                                   | <b>Start-stop time</b>           | January 2011 to December 2018 |
| <b>Research Department</b>                                                                     | Department of Thoracic Surgery                                                                                                                                                                                                              | <b>Responsible for the issue</b> | Yiping Wei                    |
| <b>Review form</b>                                                                             | The Meeting to Review                                                                                                                                                                                                                       | <b>Review category</b>           | Initial Review                |
| <b>Documents were reviewed</b>                                                                 | Research Proposal, Informed Consent                                                                                                                                                                                                         |                                  |                               |
| <b>Review decisions</b>                                                                        | Support                                                                                                                                                                                                                                     |                                  |                               |
| <b>Explain</b>                                                                                 | 1. Any amendments to the research data during the study should be submitted to the ethics committee for approval before implementation.<br>2. If serious adverse events occur, please submit reports of serious adverse events as required. |                                  |                               |
| <b>The Second Affiliated Hospital of Nanchang University Medical Research Ethics Committee</b> |                                                                                                                                                                                                                                             |                                  |                               |
| <b>Date:</b> December 15, 2010                                                                 |                                                                                                                                                                                                                                             |                                  |                               |

**Statement** This ethics committee is strictly in accordance with China's GCP and related regulations

Address No. 1, Minde Road, Nanchang city

Telephone (0791) 86292695
