# Supplementary material for: Application of Lipidomics for Assessing Tissue Lipid Profiles of Patients With Squamous Cell Carcinoma
Source: PubMed Central journal article supplement — Technol Cancer Res Treat. 2021 Nov 11;20:15330338211049903. doi: 10.1177/15330338211049903 (PMC8591777; doi:10.1177/15330338211049903), 2021-11-11
Supplement: sj-pdf-3-tct-10.1177_15330338211049903.pdf [file sj-pdf-3-tct-10.1177_15330338211049903.pdf]

# 南昌大学第二附属医院医学研究伦理委员会审查批件

审批号：研临审【2010】第（098）号

|                                 |                                                                                                                                    |                                    |                 |
|---------------------------------|------------------------------------------------------------------------------------------------------------------------------------|------------------------------------|-----------------|
| 项目名称<br>Project name            | 质谱分析磷脂判断肺癌边界的应用及基础研究                                                                                                               |                                    |                 |
| 审查时间<br>Review time             | 2010年12月15日                                                                                                                        |                                    |                 |
| 研究类别<br>Category of research    | 临床研究                                                                                                                               |                                    |                 |
| 任务来源<br>The source of the task  | <input checked="" type="checkbox"/> 国家级课题 <input type="checkbox"/> 省市级课题 <input type="checkbox"/> 自选课题 <input type="checkbox"/> 其他 |                                    |                 |
| 研究病例数<br>The number of cases    | 300 例                                                                                                                              | 起止时间<br>Start-stop time            | 2011.01—2018.12 |
| 研究科室<br>Research Department     | 胸外科                                                                                                                                | 课题负责人<br>Responsible for the issue | 魏益平             |
| 审查形式<br>Review form             | 会议审查                                                                                                                               | 审查类别<br>Review category            | 初始审查            |
| 审查文件<br>Documents were reviewed | 研究方案，知情同意书                                                                                                                         |                                    |                 |
| 审查结果<br>Review decisions        | 同意                                                                                                                                 |                                    |                 |
| 说明<br>Explain                   | <p>1、研究过程中对研究资料有任何修改请提交伦理委员会审查获批准后方可执行。</p> <p>2、如发生严重不良事件，请按要求提交严重不良事件报告。</p>                                                     |                                    |                 |

南昌大学第二附属医院医学研究伦理委员会（盖章）

日期：2010年12月15日

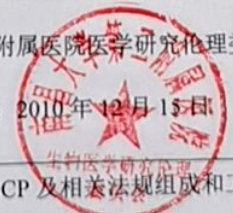

声明：本伦理委员会严格按照中国 GCP 及相关法规组成和工作

地址：南昌市民德路1号

电话：(0791) 86292695
